# Supplementary material for: Compassion in healthcare: an updated scoping review of the literature
Source: PubMed Central journal article supplement (PMC9116004; doi:10.1186/s12904-022-00942-3), 2022-05-18
Supplement: 12904_2022_942_MOESM1_ESM.pdf [file 12904_2022_942_MOESM1_ESM.pdf]

**Additional file 1: Search Strategy**

**Compassion in Healthcare: An Updated Scoping Review of the Literature  
November 2020**

Database(s): Ovid MEDLINE(R) and Epub Ahead of Print, In-Process & Other Non-Indexed Citations and Daily 1946 to November 16, 2020

Search Strategy:

| #  | Searches                                                                                                                                           | Results |
|----|----------------------------------------------------------------------------------------------------------------------------------------------------|---------|
| 1  | compassion.tw,kf.                                                                                                                                  | 6249    |
| 2  | ((compassionate or empathetic) adj1 (care or caring or communication or response* or practice* or engagement)).tw,kf.                              | 1321    |
| 3  | or/1-2                                                                                                                                             | 7260    |
| 4  | professional-patient relations/ or nurse-patient relations/ or Physician-Patient Relations/                                                        | 134238  |
| 5  | interpersonal relations/ or professional-family relations/                                                                                         | 87558   |
| 6  | "Attitude of Health Personnel"/                                                                                                                    | 123187  |
| 7  | Patient-Centered Care/ or Patient satisfaction/                                                                                                    | 100665  |
| 8  | patients/ or inpatients/ or Outpatients/                                                                                                           | 57401   |
| 9  | faculty, medical/ or faculty, nursing/ or medical staff/ or nursing staff/                                                                         | 46634   |
| 10 | Nursing Staff, Hospital/ or Medical Staff, Hospital/                                                                                               | 65781   |
| 11 | "Internship and Residency"/                                                                                                                        | 50554   |
| 12 | education, nursing/ or education, nursing, baccalaureate/                                                                                          | 50731   |
| 13 | education, medical/ or education, medical, graduate/ or education, medical, undergraduate/                                                         | 107350  |
| 14 | students, health occupations/ or students, medical/ or Students, Nursing/                                                                          | 61528   |
| 15 | exp Nurses/ or exp Physicians/ or exp Health Personnel/ or Caregivers/                                                                             | 523250  |
| 16 | ((relationship-centered or relationship-centred or patient-centered or patient-centred) adj2 (care or caring or approach* or interaction*)).tw,kf. | 10738   |
| 17 | (patient* or nurse* or physician* or practitioner* or clinician* or therapist* or caregiver*).tw,kf.                                               | 7381382 |
| 18 | (resident* or student*).tw,kf.                                                                                                                     | 468113  |
| 19 | (faculty or professor* or lecturer* or instructor*).tw,kf.                                                                                         | 76983   |
| 20 | or/4-19                                                                                                                                            | 8209142 |
| 21 | 3 and 20                                                                                                                                           | 5088    |
| 22 | limit 21 to yr="2015 -Current"                                                                                                                     | 2622    |
| 23 | limit 22 to english language                                                                                                                       | 2549    |

**Medline****November 27, 2020**Database(s): **Embase** 1974 to 2020 November 25

Search Strategy:

| #  | Searches                                                                                                                                           | Results  |
|----|----------------------------------------------------------------------------------------------------------------------------------------------------|----------|
| 1  | compassion.tw,kw.                                                                                                                                  | 7618     |
| 2  | ((compassionate or empathetic) adj1 (care or caring or communication or response* or practice* or engagement)).tw,kw.                              | 1644     |
| 3  | or/1-2                                                                                                                                             | 8904     |
| 4  | professional-patient relationship/ or doctor patient relationship/ or nurse patient relationship/                                                  | 47384    |
| 5  | human relation/                                                                                                                                    | 88520    |
| 6  | health personnel attitude/ or nurse attitude/ or physician attitude/                                                                               | 167775   |
| 7  | patient satisfaction/ or patient attitude/                                                                                                         | 206669   |
| 8  | patient/ or hospital patient/ or outpatient/                                                                                                       | 1672419  |
| 9  | medical staff/ or hospital personnel/ or medical personnel/ or nursing staff/                                                                      | 139260   |
| 10 | medical education/ or residency education/ or postgraduate education/                                                                              | 252478   |
| 11 | nursing education/                                                                                                                                 | 82975    |
| 12 | medical student/ or health student/                                                                                                                | 72399    |
| 13 | nursing student/                                                                                                                                   | 26125    |
| 14 | exp nurse/ or exp physician/ or caregiver/                                                                                                         | 989652   |
| 15 | ((relationship-centered or relationship-centred or patient-centered or patient-centred) adj2 (care or caring or approach* or interaction*)).tw,kw. | 14648    |
| 16 | (patient* or nurse* or physician* or practitioner* or clinician* or therapist* or caregiver*).tw,kw.                                               | 10578285 |
| 17 | (resident* or student*).tw,kw.                                                                                                                     | 613613   |
| 18 | (faculty or professor* or lecturer* or instructor*).tw,kw.                                                                                         | 98899    |
| 19 | or/4-18                                                                                                                                            | 11657350 |
| 20 | 3 and 19                                                                                                                                           | 6426     |
| 21 | limit 20 to yr="2015 -Current"                                                                                                                     | 3382     |
| 22 | limit 21 to conference abstracts                                                                                                                   | 833      |
| 23 | 21 not 22                                                                                                                                          | 2549     |
| 24 | limit 23 to english language                                                                                                                       | 2480     |

**CENTRAL**  
**November 27, 2020**

Database(s): **EBM Reviews - Cochrane Central Register of Controlled Trials** October 2020

Search Strategy:

| #  | Searches                                                                                                                                           | Results |
|----|----------------------------------------------------------------------------------------------------------------------------------------------------|---------|
| 1  | compassion.tw,kw.                                                                                                                                  | 860     |
| 2  | ((compassionate or empathetic) adj1 (care or caring or communication or response* or practice* or engagement)).tw,kw.                              | 61      |
| 3  | or/1-2                                                                                                                                             | 908     |
| 4  | professional-patient relations/ or nurse-patient relations/ or Physician-Patient Relations/                                                        | 2538    |
| 5  | interpersonal relations/ or professional-family relations/                                                                                         | 2439    |
| 6  | "Attitude of Health Personnel"/                                                                                                                    | 1979    |
| 7  | Patient-Centered Care/ or Patient satisfaction/                                                                                                    | 11986   |
| 8  | patients/ or inpatients/ or Outpatients/                                                                                                           | 2442    |
| 9  | faculty, medical/ or faculty, nursing/ or medical staff/ or nursing staff/                                                                         | 338     |
| 10 | Nursing Staff, Hospital/ or Medical Staff, Hospital/                                                                                               | 688     |
| 11 | "Internship and Residency"/                                                                                                                        | 1266    |
| 12 | education, nursing/ or education, nursing, baccalaureate/                                                                                          | 497     |
| 13 | education, medical/ or education, medical, graduate/ or education, medical, undergraduate/                                                         | 1633    |
| 14 | students, health occupations/ or students, medical/ or Students, Nursing/                                                                          | 1500    |
| 15 | exp Nurses/ or exp Physicians/ or exp Health Personnel/ or Caregivers/                                                                             | 8578    |
| 16 | ((relationship-centered or relationship-centred or patient-centered or patient-centred) adj2 (care or caring or approach* or interaction*)).tw,kw. | 1007    |
| 17 | (patient* or nurse* or physician* or practitioner* or clinician* or therapist* or caregiver*).tw,kw.                                               | 1035570 |
| 18 | (resident* or student*).tw,kw.                                                                                                                     | 49504   |
| 19 | (faculty or professor* or lecturer* or instructor*).tw,kw.                                                                                         | 5430    |
| 20 | or/4-19                                                                                                                                            | 1070500 |
| 21 | 3 and 20                                                                                                                                           | 585     |
| 22 | limit 21 to yr="2015 -Current"                                                                                                                     | 483     |
| 23 | limit 22 to english language                                                                                                                       | 277     |

**PsycINFO**  
**November 27, 2020**

Database(s): **APA PsycInfo** 1806 to November Week 3 2020

Search Strategy:

| #  | Searches                                                                                                                                           | Results |
|----|----------------------------------------------------------------------------------------------------------------------------------------------------|---------|
| 1  | compassion.tw,id.                                                                                                                                  | 8888    |
| 2  | ((compassionate or empathetic) adj1 (care or caring or communication or response* or practice* or engagement)).tw,id.                              | 795     |
| 3  | or/1-2                                                                                                                                             | 9454    |
| 4  | Therapeutic Processes/ or interpersonal relationships/                                                                                             | 44576   |
| 5  | health personnel attitudes/                                                                                                                        | 19931   |
| 6  | patient centered care/                                                                                                                             | 233     |
| 7  | client satisfaction/                                                                                                                               | 5645    |
| 8  | patients/ or hospitalized patients/ or outpatients/                                                                                                | 45234   |
| 9  | medical education/ or medical internship/ or medical residency/ or nursing education/                                                              | 27681   |
| 10 | medical students/ or nursing students/                                                                                                             | 18639   |
| 11 | exp nurses/ or exp medical personnel/ or exp physicians/                                                                                           | 83031   |
| 12 | exp nurses/ or exp medical personnel/ or exp physicians/ or exp caregivers/                                                                        | 111325  |
| 13 | ((relationship-centered or relationship-centred or patient-centered or patient-centred) adj2 (care or caring or approach* or interaction*)).tw,id. | 3152    |
| 14 | (patient* or nurse* or physician* or practitioner* or clinician* or therapist* or caregiver*).tw,id.                                               | 992561  |
| 15 | (resident* or student*).tw,id.                                                                                                                     | 664918  |
| 16 | (faculty or professor* or lecturer* or instructor*).tw,id.                                                                                         | 66225   |
| 17 | or/4-16                                                                                                                                            | 1658085 |
| 18 | 3 and 17                                                                                                                                           | 4712    |
| 19 | limit 18 to yr="2015 -Current"                                                                                                                     | 2276    |
| 19 | limit 20 to peer reviewed journal                                                                                                                  | 1487    |

**CINAHL**  
**November 27, 2020**

| #   | Query                                                                                                                                                                                                                                                                                                                                                                              | Results   |
|-----|------------------------------------------------------------------------------------------------------------------------------------------------------------------------------------------------------------------------------------------------------------------------------------------------------------------------------------------------------------------------------------|-----------|
| S1  | TI compassion OR AB compassion                                                                                                                                                                                                                                                                                                                                                     | 5,765     |
| S2  | TI ( ((compassionate or empathetic) N1 (care or caring or communication or response* or practice* or engagement)) ) OR AB ( ((compassionate or empathetic) N1 (care or caring or communication or response* or practice* or engagement)) )                                                                                                                                         | 1,569     |
| S3  | S1 OR S2                                                                                                                                                                                                                                                                                                                                                                           | 7,024     |
| S4  | (MH "Interpersonal Relations") OR (MH "Interprofessional Relations") OR (MH "Intraprofessional Relations") OR (MH "Patient-Family Relations") OR (MH "Nurse-Physician Relations") OR (MH "Professional-Client Relations") OR (MH "Professional-Family Relations") OR (MH "Professional-Patient Relations") OR (MH "Nurse-Patient Relations") OR (MH "Physician-Patient Relations") | 203,826   |
| S5  | (MH "Attitude of Health Personnel") OR (MH "Nurse Attitudes") OR (MH "Physician Attitudes")                                                                                                                                                                                                                                                                                        | 90,322    |
| S6  | (MH "Patient Centered Care")                                                                                                                                                                                                                                                                                                                                                       | 31,020    |
| S7  | (MH "Patient Satisfaction")                                                                                                                                                                                                                                                                                                                                                        | 56,112    |
| S8  | (MH "Patients") OR (MH "Outpatients") OR (MH "Inpatients")                                                                                                                                                                                                                                                                                                                         | 134,246   |
| S9  | (MH "Faculty, Medical") OR (MH "Faculty, Nursing") OR (MH "Medical Staff") OR (MH "Medical Staff, Hospital") OR (MH "Nursing Staff, Hospital")                                                                                                                                                                                                                                     | 46,659    |
| S10 | (MH "Internship and Residency")                                                                                                                                                                                                                                                                                                                                                    | 17,609    |
| S11 | (MH "Education, Nursing") OR (MH "Education, Nursing, Baccalaureate") OR (MH "Education, Nursing, Graduate")                                                                                                                                                                                                                                                                       | 61,001    |
| S12 | (MH "Education, Medical") OR (MH "Education, Health Sciences")                                                                                                                                                                                                                                                                                                                     | 32,908    |
| S13 | (MH "Students, Health Occupations") OR (MH "Students, Allied Health") OR (MH "Students, Medical") OR (MH "Students, Nursing") OR (MH "Students, Nursing, Baccalaureate") OR (MH "Students, Nursing, Graduate")                                                                                                                                                                     | 55,005    |
| S14 | (MH "Nurses+") OR (MH "Physicians+") OR (MH "Health Personnel+") OR (MH "Allied Health Personnel+") OR (MH "Caregivers")                                                                                                                                                                                                                                                           | 619,824   |
| S15 | TI ( ((relationship-centered or relationship-centred or patient-centered or patient-centred) N2 (care or caring or approach* or interaction*)) ) OR AB ( ((relationship-centered or relationship-centred or patient-centered or patient-centred) N2 (care or caring or approach* or interaction*)) )                                                                               | 7,144     |
| S16 | TI ( (patient* or nurse* or physician* or practitioner* or clinician* or therapist* or caregiver*) ) OR AB ( (patient* or nurse* or physician* or practitioner* or clinician* or therapist* or caregiver*) )                                                                                                                                                                       | 2,202,624 |
| S17 | TI ( (resident* or student*) ) OR AB ( (resident* or student*) )                                                                                                                                                                                                                                                                                                                   | 244,191   |
| S18 | TI ( (faculty or professor* or lecturer* or instructor*) ) OR AB ( (faculty or professor* or lecturer* or instructor*) )                                                                                                                                                                                                                                                           | 44,033    |
| S19 | S4 OR S5 OR S6 OR S7 OR S8 OR S9 OR S10 OR S11 OR S12 OR S13 OR S14 OR S15 OR S16 OR S17 OR S18                                                                                                                                                                                                                                                                                    | 2,930,356 |
| S20 | S3 AND S19                                                                                                                                                                                                                                                                                                                                                                         | 5,128     |
| S21 | S3 AND S19<br>Limiters - Published Date: 20150101-20211231                                                                                                                                                                                                                                                                                                                         | 2,618     |
| S22 | S3 AND S19<br>Limiters - Published Date: 20150101-20211231; Scholarly (Peer Reviewed) Journals                                                                                                                                                                                                                                                                                     | 2,241     |
| S23 | S3 AND S19<br>Limiters - Published Date: 20150101-20211231; Scholarly (Peer Reviewed) Journals<br>Narrow by Language: - english                                                                                                                                                                                                                                                    | 2,179     |

**Academic Search Complete**  
**November 27, 2020**

| #   | Query                                                                                                                                                                                                                                                                                                                                                                                                                                                                | Results   |
|-----|----------------------------------------------------------------------------------------------------------------------------------------------------------------------------------------------------------------------------------------------------------------------------------------------------------------------------------------------------------------------------------------------------------------------------------------------------------------------|-----------|
| S1  | TI compassion OR AB compassion OR KW compassion                                                                                                                                                                                                                                                                                                                                                                                                                      | 12,553    |
| S2  | TI ( ( ((compassionate or empathetic) N1 (care or caring or communication or response* or practice* or engagement)) ) ) OR AB ( ( ((compassionate or empathetic) N1 (care or caring or communication or response* or practice* or engagement)) ) ) OR KW ( ( ((compassionate or empathetic) N1 (care or caring or communication or response* or practice* or engagement)) ) )                                                                                        | 1,441     |
| S3  | S1 OR S2                                                                                                                                                                                                                                                                                                                                                                                                                                                             | 13,698    |
| S4  | DE "INTERPERSONAL relations" OR DE "MEDICAL personnel-caregiver relationships" OR DE "NURSE-patient relationships" OR DE "NURSE-physician relationships" OR DE "PATIENT-family relations" OR DE "PATIENT-professional relations" OR DE "PHYSICIAN-patient relations"                                                                                                                                                                                                 | 107,823   |
| S5  | DE "ATTITUDES of medical personnel" OR DE "PHYSICIANS' attitudes" OR DE "NURSES' attitudes"                                                                                                                                                                                                                                                                                                                                                                          | 12,817    |
| S6  | DE "PATIENT-centered care"                                                                                                                                                                                                                                                                                                                                                                                                                                           | 11,496    |
| S7  | DE "PATIENT satisfaction"                                                                                                                                                                                                                                                                                                                                                                                                                                            | 22,939    |
| S8  | DE "PATIENTS" OR DE "HOSPITAL patients"                                                                                                                                                                                                                                                                                                                                                                                                                              | 256,707   |
| S9  | DE "MEDICAL school faculty" OR DE "HEALTH occupations school faculty" OR DE "NURSING school faculty"                                                                                                                                                                                                                                                                                                                                                                 | 1,247     |
| S10 | DE "HOSPITAL medical staff" OR DE "HOSPITAL personnel" OR DE "HOSPITAL nursing staff" OR DE "INTERNS (Medicine)" OR DE "RESIDENTS (Medicine)" OR DE "HOSPITAL nursing staff"                                                                                                                                                                                                                                                                                         | 12,360    |
| S11 | DE "NURSING education" OR DE "BACCALAUREATE nursing education" OR DE "GRADUATE nursing education" OR DE "MEDICAL education" OR DE "ALLIED health education" OR DE "GRADUATE medical education" OR DE "HEALTH education"                                                                                                                                                                                                                                              | 63,546    |
| S12 | DE "NURSING students" OR DE "HEALTH occupations students" OR DE "MEDICAL students"                                                                                                                                                                                                                                                                                                                                                                                   | 33,754    |
| S13 | DE "NURSES" OR DE "PHYSICIANS" OR DE "MEDICAL personnel" OR DE "CAREGIVERS" OR DE "ALLIED health personnel"                                                                                                                                                                                                                                                                                                                                                          | 194,471   |
| S14 | TI ( ( ((relationship-centered or relationship-centred or patient-centered or patient-centred) N2 (care or caring or approach* or interaction*)) ) ) OR AB ( ( ((relationship-centered or relationship-centred or patient-centered or patient-centred) N2 (care or caring or approach* or interaction*)) ) ) OR KW ( ( ((relationship-centered or relationship-centred or patient-centered or patient-centred) N2 (care or caring or approach* or interaction*)) ) ) | 7,468     |
| S15 | TI ( ( (patient* or nurse* or physician* or practitioner* or clinician* or therapist* or caregiver*) ) ) OR AB ( ( (patient* or nurse* or physician* or practitioner* or clinician* or therapist* or caregiver*) ) ) OR KW ( ( (patient* or nurse* or physician* or practitioner* or clinician* or therapist* or caregiver*) ) )                                                                                                                                     | 3,452,564 |
| S16 | TI ( ( (resident* or student*) ) ) OR AB ( ( (resident* or student*) ) ) OR KW ( ( (resident* or student*) ) )                                                                                                                                                                                                                                                                                                                                                       | 992,295   |
| S17 | TI ( ( (faculty or professor* or lecturer* or instructor*) ) ) OR AB ( ( (faculty or professor* or lecturer* or instructor*) ) ) OR KW ( ( (faculty or professor* or lecturer* or instructor*) ) )                                                                                                                                                                                                                                                                   | 255,487   |
| S18 | S4 OR S5 OR S6 OR S7 OR S8 OR S9 OR S10 OR S11 OR S12 OR S13 OR S14 OR S15 OR S16 OR S17                                                                                                                                                                                                                                                                                                                                                                             | 4,698,715 |
| S19 | S3 AND S18                                                                                                                                                                                                                                                                                                                                                                                                                                                           | 5,067     |
| S20 | S3 AND S18<br>Limiters - Published Date: 20150101-20211231                                                                                                                                                                                                                                                                                                                                                                                                           | 2,464     |
| S21 | S3 AND S18<br>Limiters - Published Date: 20150101-20211231; Scholarly (Peer Reviewed) Journals                                                                                                                                                                                                                                                                                                                                                                       | 2,201     |
| S22 | S3 AND S18<br>Limiters - Published Date: 20150101-20211231; Scholarly (Peer Reviewed) Journals<br>Narrow by Language: - english                                                                                                                                                                                                                                                                                                                                      | 2,090     |





**SCOPUS**

**November 27, 2020**

**3,104**

(( TITLE-ABS-KEY ( compassion ) OR TITLE-ABS-KEY ((( compassionate OR empathetic ) W/1 ( care OR caring OR communication OR response\* OR practice\* OR engagement ) ) ) ) AND ( ( TITLE-ABS-KEY ( ( relationship-centered OR relationship-centred OR patient-centered OR patient-centred ) W/2 ( care OR caring OR approach\* OR interaction\* ) ) ) OR TITLE-ABS-KEY ( ( patient\* OR nurse\* OR physician\* OR practitioner\* OR clinician\* OR therapist\* OR caregiver\* ) ) OR TITLE-ABS-KEY ( ( resident\* OR student\* ) ) OR TITLE-ABS-KEY ( ( faculty OR professor\* OR lecturer\* OR instructor\* ) ) ) ) AND ( LIMIT-TO ( PUBYEAR , 2021 ) OR LIMIT-TO ( PUBYEAR , 2020 ) OR LIMIT-TO ( PUBYEAR , 2019 ) OR LIMIT-TO ( PUBYEAR , 2018 ) OR LIMIT-TO ( PUBYEAR , 2017 ) OR LIMIT-TO ( PUBYEAR , 2016 ) OR LIMIT-TO ( PUBYEAR , 2015 ) ) AND ( LIMIT-TO ( DOCTYPE , "ar" ) ) AND ( LIMIT-TO ( LANGUAGE , "English" ) )

Downloaded files

Scopus 2021,2020, 2019, 2018 = 1936

Scopus 2017, 2016, 2015 = 1168
